# Supplementary material for: A one-dimensional selenotungstate based on neodymium and {SeO 3 } groups for catalytic synthesis of imidazoles
Source: Royal Society of Chemistry journal article supplement (doi:10.1039/d5dt02801a), 2026-01-01
Supplement: d5dt02801a1.pdf [file d5dt02801a1.pdf]

## Supporting Information

### A One-dimensional Selenotungstate Based on Neodymium and {SeO<sub>3</sub>} Groups Connecting for Catalytic Synthesis of Imidazoles

Hao-Zhe Wang,<sup>a</sup> Yu-Feng Liu,<sup>\*a</sup> Zhou-Fu Lin,<sup>a</sup> Shi-Xiong Li,<sup>\*b</sup> Guo-Ping Yang<sup>\*a</sup>

<sup>a</sup>Jiangxi Key Laboratory for Mass Spectrometry and Instrumentation, Jiangxi Province Key Laboratory of Functional Organic Polymers, East China University of Technology, Nanchang 330013, China.

<sup>b</sup>School of Mechanical and Resource Engineering, Wuzhou University, Wuzhou, Guangxi 543003, China

Corresponding author: yfliu@ecut.edu.cn (Y. F. Liu); lsx1324@163.com (S. X. Li); erick@ecut.edu.cn (G. P. Yang)

### Table of Contents

|                                                    |    |
|----------------------------------------------------|----|
| 1. General Information .....                       | 2  |
| 2. Experimental.....                               | 3  |
| 3. Characterization.....                           | 4  |
| 4. Characterization of Products <sup>4</sup> ..... | 10 |
| 5. Notes and References .....                      | 22 |

## 1. General Information

### Materials and Methods

All reagents were obtained from commercial sources and used without further purification.

The FT-IR spectrum was obtained by using a Fourier transform infrared (FT-IR) (4000-500  $\text{cm}^{-1}$ ) spectrometer (Thermo Nicolet iS5) at 0.5  $\text{cm}^{-1}$  resolution and 16 scans. Thermogravimetric analyses (TGA) were performed under an  $\text{N}_2$  atmosphere on Mettler-Toledo TGA/SDTA 851<sup>e</sup> thermal analyzer from 30 to 800  $^{\circ}\text{C}$ . Powder X-ray diffraction (PXRD) was performed on a Bruker D8 Advance diffractometer with Cu  $\text{K}\alpha$  radiation ( $\lambda = 1.5406 \text{ \AA}$ ) at room temperature. Inductively coupled plasma optical emission spectrum (ICP-OES) data were obtained on an Agilent 725 ICP-OES spectrometer. Elemental analyses (EA) (C, H, and N) were performed on a Vario EL Cube CHN elemental analyzer. The solid-state ultraviolet diffuse reflection spectrum was acquired on a UV-8000 ultraviolet and visible spectrophotometer equipping an integrating sphere (Shanghai Metash Instruments Co., Ltd). The GC analysis was performed on Agilent 7890B equipped with a capillary column (HP-5, 30 m  $\times$  0.25  $\mu\text{m}$ ) using a flame ionization detector. The GC-MS were recorded on Agilent 7890B-7000D.

### X-ray Crystallography

The single crystal X-ray diffraction data were collected on Bruker D8 Smart Apex II diffractometer with graphite monochromated Mo  $\text{K}\alpha$  radiation ( $\lambda = 0.71073 \text{ \AA}$ ). Intensities were collected by  $\omega$ -scan and reduced on *APEX 3* and a multi-scan absorption correction was applied.<sup>1</sup> The structures were solved and refined on *Olex2* using the *SHELX* package.<sup>2</sup> Parameters of the crystal data collection and refinement are given in Table S1. The CCDC number is 2489933.

## 2. Experimental

### Synthesis of NdSeW

$\text{Na}_2\text{WO}_4 \cdot 2\text{H}_2\text{O}$  (6.00 mmol, 1.98 g),  $\text{Na}_2\text{SeO}_3$  (0.80 mmol, 0.14 g),  $\text{NH}_4\text{Cl}$  (12.00 mmol, 0.32 g), and DL-malic acid (0.30 mmol, 0.04 g) were sequentially dissolved in deionized water (20.00 mL). The solution was adjusted to pH = 4.50 using dilute HCl and stirred for 10 min.  $\text{NdCl}_3 \cdot 6\text{H}_2\text{O}$  (0.40 mmol, 0.14 g) was subsequently added to the solution and the pH was adjusted to 4.00 after the solids were completely dissolved. The solution was stirred for another 30 min before being filtered. The clear filtrate was left to evaporate at room temperature. Colorless stick crystals were collected after about five weeks (yield: 31.5% based on W). Elemental analysis (%): C, 0.53; H, 0.74; Na, 4.10; Nd, 4.02; W, 61.38. FT-IR ( $\text{cm}^{-1}$ ): 3407 (m), 3209 (m), 1621 (s), 1576 (s), 1416 (vs), 1193 (w), 1123 (w), 1052 (w), 1016 (w), 957 (vs), 832 (vs), 780 (vs), 684 (vs), 633 (vs).

### Synthetic of $(\text{NH}_4)_6\text{Na}_{18}[\text{Se}_6\text{W}_{39}\text{O}_{141}(\text{H}_2\text{O})_3] \cdot 60\text{H}_2\text{O}$ ( $\{\text{Se}_6\text{W}_{39}\}$ )

$\text{Na}_2\text{WO}_4 \cdot 2\text{H}_2\text{O}$  (4.0 g, 12.1 mmol),  $\text{Na}_2\text{SeO}_3$  (0.4 g, 2.31 mmol) and  $\text{NH}_4\text{NO}_3$  (0.15 g, 1.87 mmol) were dissolved with stirring in 40 ml  $\text{H}_2\text{O}$ . The pH of the solution was then adjusted to 4.0 by 70%  $\text{HNO}_3$  and maintained at this value for 5 minutes. The solution was subsequently filtered and the filtrate was collected in a 100 mL conical flask and allowed to stand at 4 °C. Large colourless needle-shaped crystals of  $\{\text{Se}_6\text{W}_{39}\}$  were collected after two days. Yield: 0.70 g, (19.2 %, based on tungsten). FT-IR ( $\text{cm}^{-1}$ ): 3383 (m), 3229 (m), 1625 (m), 1423 (m), 1118 (w), 943 (m), 882 (m), 750 (vs), 654 (vs), 602 (vs).

### Typical procedure of the three-component condensation reaction

To a 4 mL reaction vial, benzaldehydes (**1**, 0.2 mmol), benzils (**2**, 0.2 mmol), ammonium acetate (**3a**, 0.6 mmol), **NdSeW** (0.5 mol%), and EtOH (1 mL) were added. Then the reaction was carried out in screw cap vials with a Teflon seal at 90 °C for 3 h. After the reaction, the mixture was purified by column chromatography (petroleum ether/EtOAc) or recrystallization to afford the desired products. Upon completion of the reaction, the catalyst was collected by centrifugation, washed sequentially three times with ethyl acetate and ethanol, and subsequently regenerated by drying under vacuum at 50 °C for 3 h to be reactivated for further use.

### 3. Characterization

**Table S1.** Crystallographic data and structure refinement of **NdSeW** (SQUEEZE).

|                                              |                                                                                                                    |
|----------------------------------------------|--------------------------------------------------------------------------------------------------------------------|
| CCDC                                         | 2489933                                                                                                            |
| Empirical formula                            | C <sub>4</sub> H <sub>3</sub> Na <sub>3.5</sub> Nd <sub>2.5</sub> O <sub>118</sub> Se <sub>5</sub> W <sub>30</sub> |
| Formula weight                               | 8290.43                                                                                                            |
| Temperature (K)                              | 150                                                                                                                |
| Crystal system                               | monoclinic                                                                                                         |
| Space group                                  | C2/c                                                                                                               |
| a (Å)                                        | 41.1758(15)                                                                                                        |
| b (Å)                                        | 37.6331(14)                                                                                                        |
| c (Å)                                        | 25.8350(11)                                                                                                        |
| α (°)                                        | 90                                                                                                                 |
| β (°)                                        | 118.3350(10)                                                                                                       |
| γ (°)                                        | 90                                                                                                                 |
| V (Å <sup>3</sup> )                          | 35237(2)                                                                                                           |
| F (000)                                      | 28396.0                                                                                                            |
| Z                                            | 8                                                                                                                  |
| ρ <sub>calcd</sub> (g·cm <sup>-3</sup> )     | 3.126                                                                                                              |
| μ (mm <sup>-1</sup> )                        | 21.332                                                                                                             |
| Crystal size (mm <sup>3</sup> )              | 0.21 × 0.15 × 0.14                                                                                                 |
| 2θ range for data collection (°)             | 3.864 to 52.904                                                                                                    |
| Index ranges                                 | -51 ≤ h ≤ 51, -46 ≤ k ≤ 47, -32 ≤ l ≤ 30                                                                           |
| Reflections collected                        | 180974                                                                                                             |
| Independent reflections                      | 36190 [R <sub>int</sub> = 0.0800, R <sub>sigma</sub> = 0.0631]                                                     |
| Restraints                                   | 0                                                                                                                  |
| Parameter                                    | 1491                                                                                                               |
| GOOF on F <sup>2</sup>                       | 1.021                                                                                                              |
| R <sub>1</sub> <sup>a</sup> [I ≥ 2σ(I)]      | 0.0493                                                                                                             |
| wR <sub>2</sub> <sup>b</sup> (all data)      | 0.1304                                                                                                             |
| Largest diff. peak/hole (e Å <sup>-3</sup> ) | 3.15/-1.23                                                                                                         |

$$^a R_1 = \sum ||F_o| - |F_c|| / \sum |F_o|, \quad ^b wR_2 = \{ \sum [w(F_o^2 - F_c^2)^2] / \sum [w(F_o^2)^2] \}^{1/2}$$

**Table S2.** Bond valence calculations for Nd and W atoms in **NdSbW**.

| Atom | BVS  | Valence | Atom | BVS  | Valence |
|------|------|---------|------|------|---------|
| Nd1  | 3.29 | +3      | W15  | 5.66 | +6      |
| Nd2  | 3.26 | +3      | W16  | 6.48 | +6      |
| Nd3  | 3.01 | +3      | W17  | 5.99 | +6      |
| W1   | 6.16 | +6      | W18  | 6.00 | +6      |
| W2   | 6.21 | +6      | W19  | 6.30 | +6      |
| W3   | 5.92 | +6      | W20  | 6.19 | +6      |
| W4   | 5.85 | +6      | W21  | 5.93 | +6      |
| W5   | 6.11 | +6      | W22  | 6.04 | +6      |
| W6   | 6.09 | +6      | W23  | 5.98 | +6      |
| W7   | 6.42 | +6      | W24  | 6.37 | +6      |
| W8   | 6.33 | +6      | W25  | 5.82 | +6      |
| W9   | 6.29 | +6      | W26  | 6.03 | +6      |
| W10  | 6.18 | +6      | W27  | 5.86 | +6      |
| W11  | 5.97 | +6      | W28  | 6.21 | +6      |
| W12  | 6.10 | +6      | W29  | 5.99 | +6      |
| W13  | 6.15 | +6      | W30  | 6.23 | +6      |
| W14  | 6.19 | +6      |      |      |         |

Bond valence sum (BVS) analysis: The BVS values ( $V_i$ ) of metal atoms were calculated using the following equation:<sup>3</sup>

$$V_i = \sum \exp[(r_0 - r_{ij})/B] \quad (1)$$

where  $r_0$  is the bond valence parameter for a given atom pair,  $r_{ij}$  is the bond length between atoms  $i$  and  $j$  obtained from the crystal structure.

**Table S3.** Comparison of the present catalytic system with other heterogeneous catalysts reported before.

| Entry | Catalyst                                                   | Loading  | Time/h | Solvent          | T/°C | Yield/% | Ref.      |
|-------|------------------------------------------------------------|----------|--------|------------------|------|---------|-----------|
| 1     | <b>NdSeW</b>                                               | 0.5 mol% | 3      | EtOH             | 90   | 97      | This work |
| 2     | ZnO/CuI/PPy                                                | 20 mg    | 0.8    | Neat             | 100  | 95      | 4         |
| 3     | Fe <sub>3</sub> O <sub>4</sub> @SiO <sub>2</sub> -imid-PMA | 30 mg    | 1.5    | Solvent-free     | 110  | 92      | 5         |
| 4     | (CTA) <sub>3</sub> PMo-MMT                                 | 50 mg    | 1      | Solvent-free     | 100  | 78      | 6         |
| 5     | InCl <sub>3</sub> ·3H <sub>2</sub> O                       | 10 mol%  | 8.3    | MeOH             | rt   | 82      | 7         |
| 6     | PMO@ILBF <sub>4</sub>                                      | 35 mg    | 2      | EtOH             | 80   | 94      | 8         |
| 7     | L-proline                                                  | 15 mol%  | 9      | MeOH             | 60   | 90      | 9         |
| 8     | Au@RGO                                                     | 54 mg    | 6      | H <sub>2</sub> O | 50   | 93      | 10        |

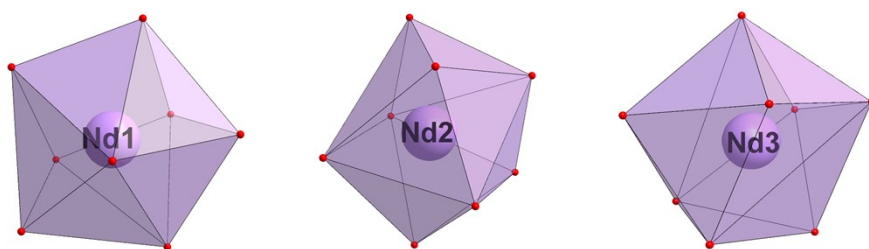

**Figure S1.** Octahedral coordination of the Nd atom.

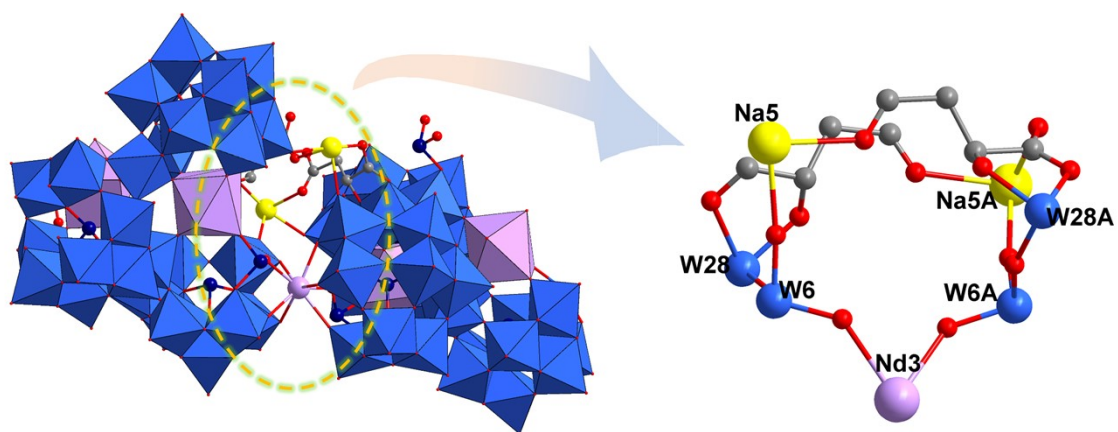

**Figure S2.** Schematic diagram of the dimer formation of **NdSeW** via bridging.

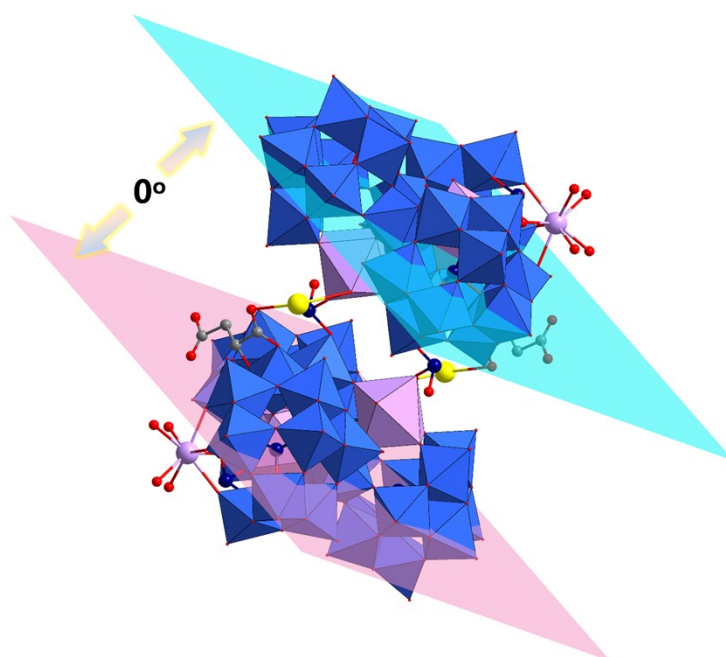

**Figure S3.** The angle between the dimers of **NdSeW**

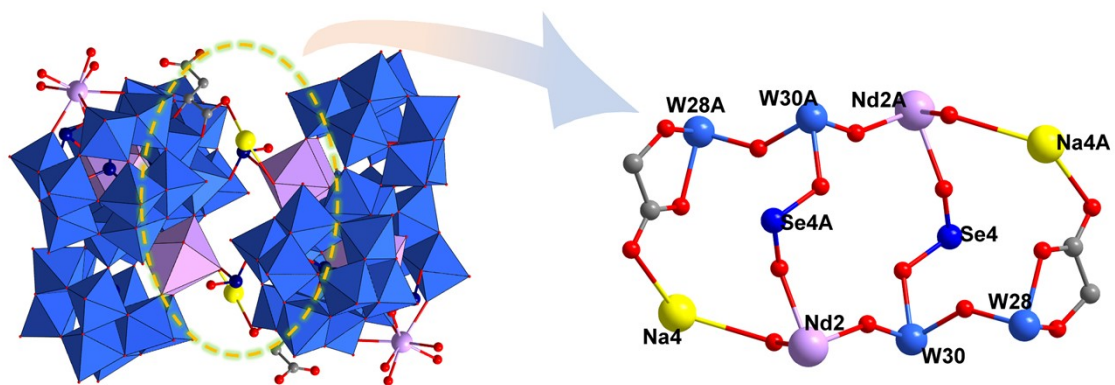

**Figure S4** Bridging mode between the dimers of **NdSeW**.

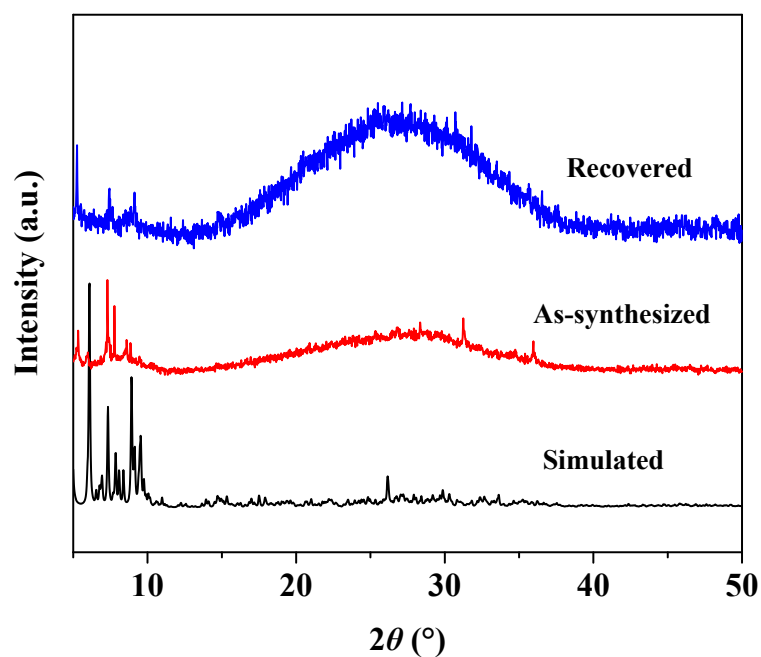

**Figure S5** PXRD patterns of NdSeW.

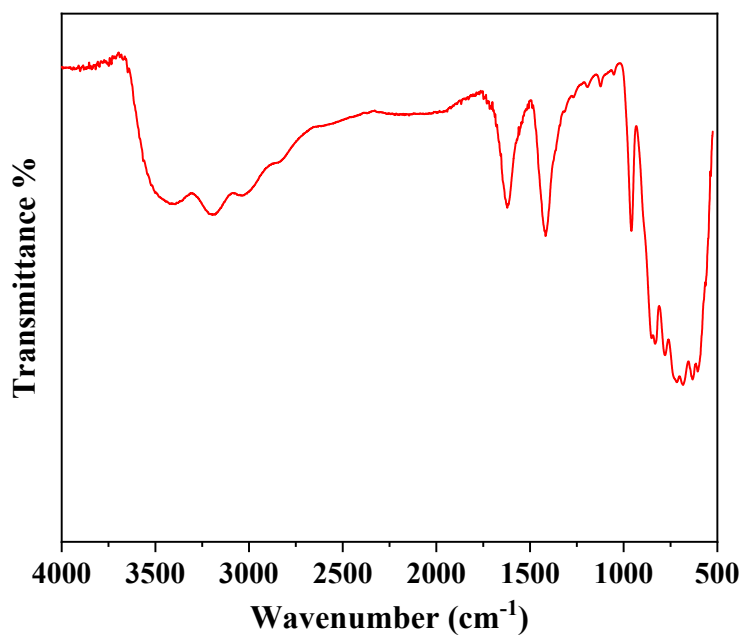

**Figure S6** FT-IR spectra of NdSeW.

The spectrum showed  $\nu(\text{W}-\text{O}-\text{W})$  bridges at 780 and 832  $\text{cm}^{-1}$ , terminal  $\nu(\text{W}=\text{O})$  bonds at 957  $\text{cm}^{-1}$ , and  $\nu(\text{Se}-\text{O})$  vibrations at 1052  $\text{cm}^{-1}$ . Features associated with the DL-malic acid ligand were also discernible, with  $\text{C}=\text{O}$  and  $\text{C}-\text{O}$  stretching vibrations occurring at 1621 and 1416  $\text{cm}^{-1}$ , respectively, validating its coordination. Finally, a broad band centered at 3407  $\text{cm}^{-1}$  was indicative of O-H stretches from water molecules.



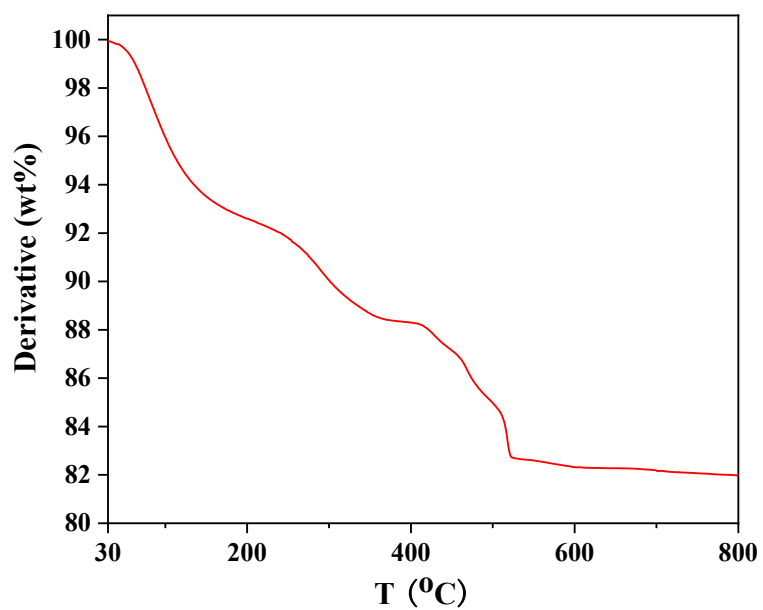

**Figure S7** TGA curve of NdSeW.

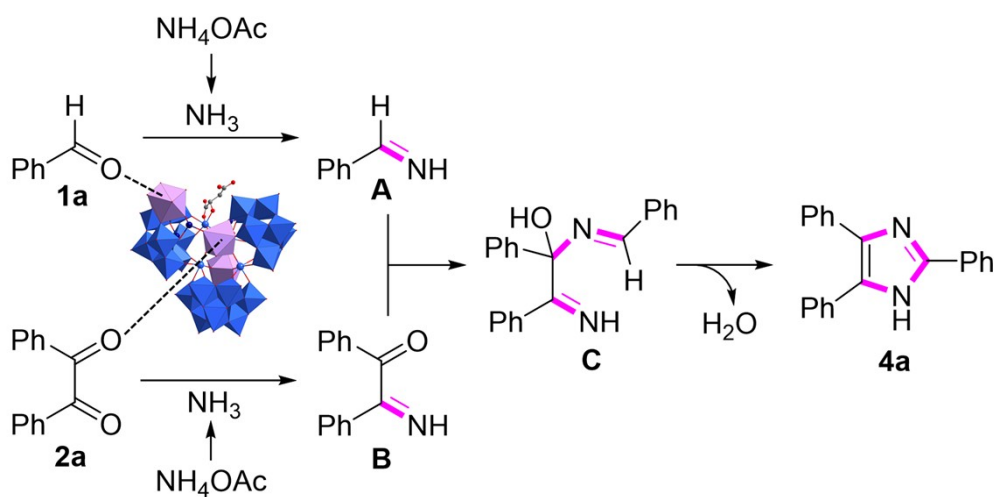

**Figure S8** The possible catalytic mechanism.

#### 4. Characterization of Products<sup>11</sup>

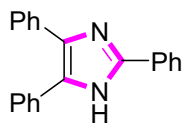

##### 2,4,5-triphenyl-1*H*-imidazole (4a)

EI-MS:  $C_{21}H_{16}N_2$ ,  $m/z$  (%) = 296.0 (33%)  $[M^+]$ .

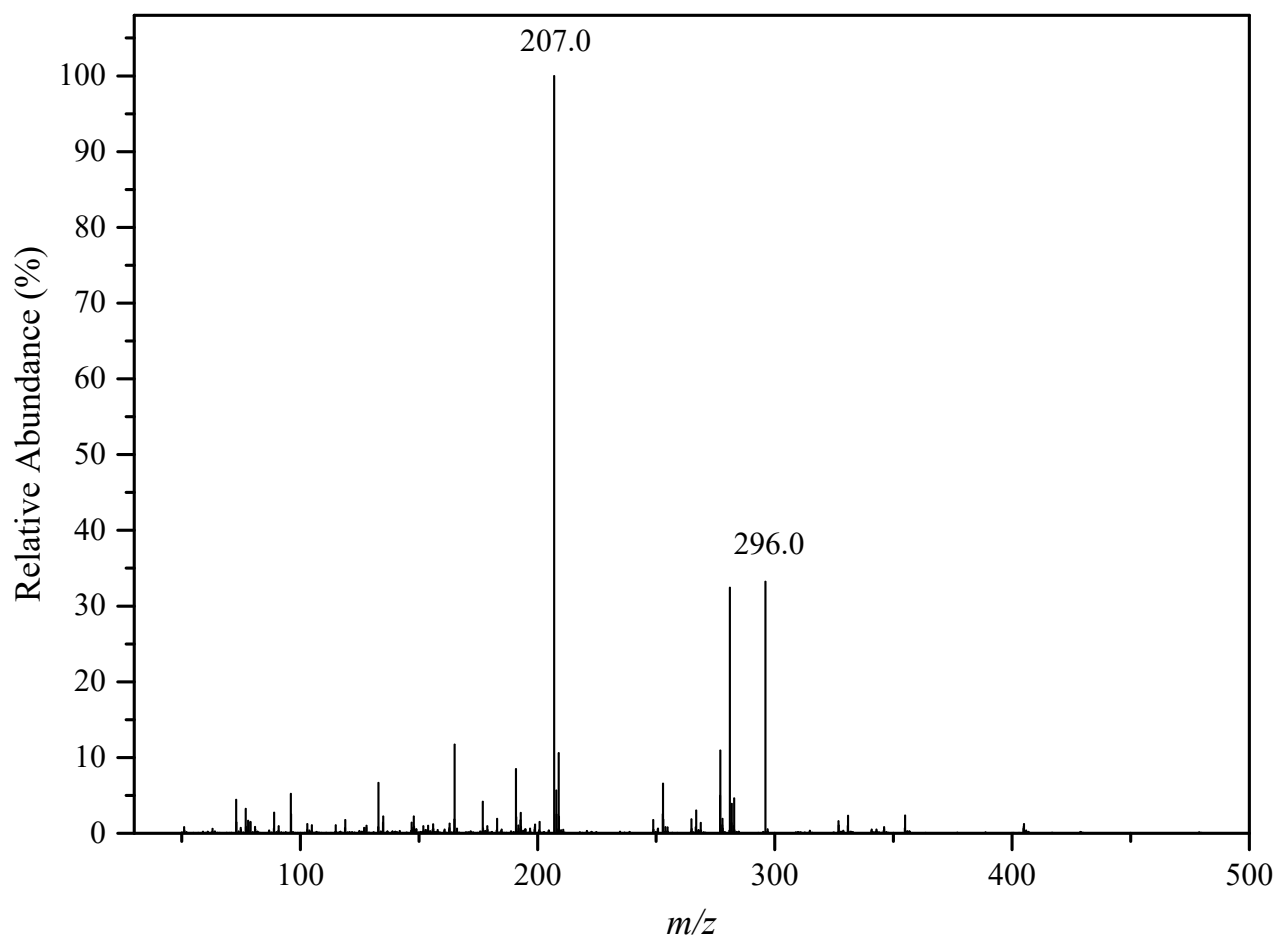

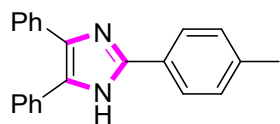

**4,5-diphenyl-2-(p-tolyl)-1*H*-imidazole (4b)**

**EI-MS:** C<sub>22</sub>H<sub>18</sub>N<sub>2</sub>,  $m/z$  (%) = 310.0 (100%) [M<sup>+</sup>].

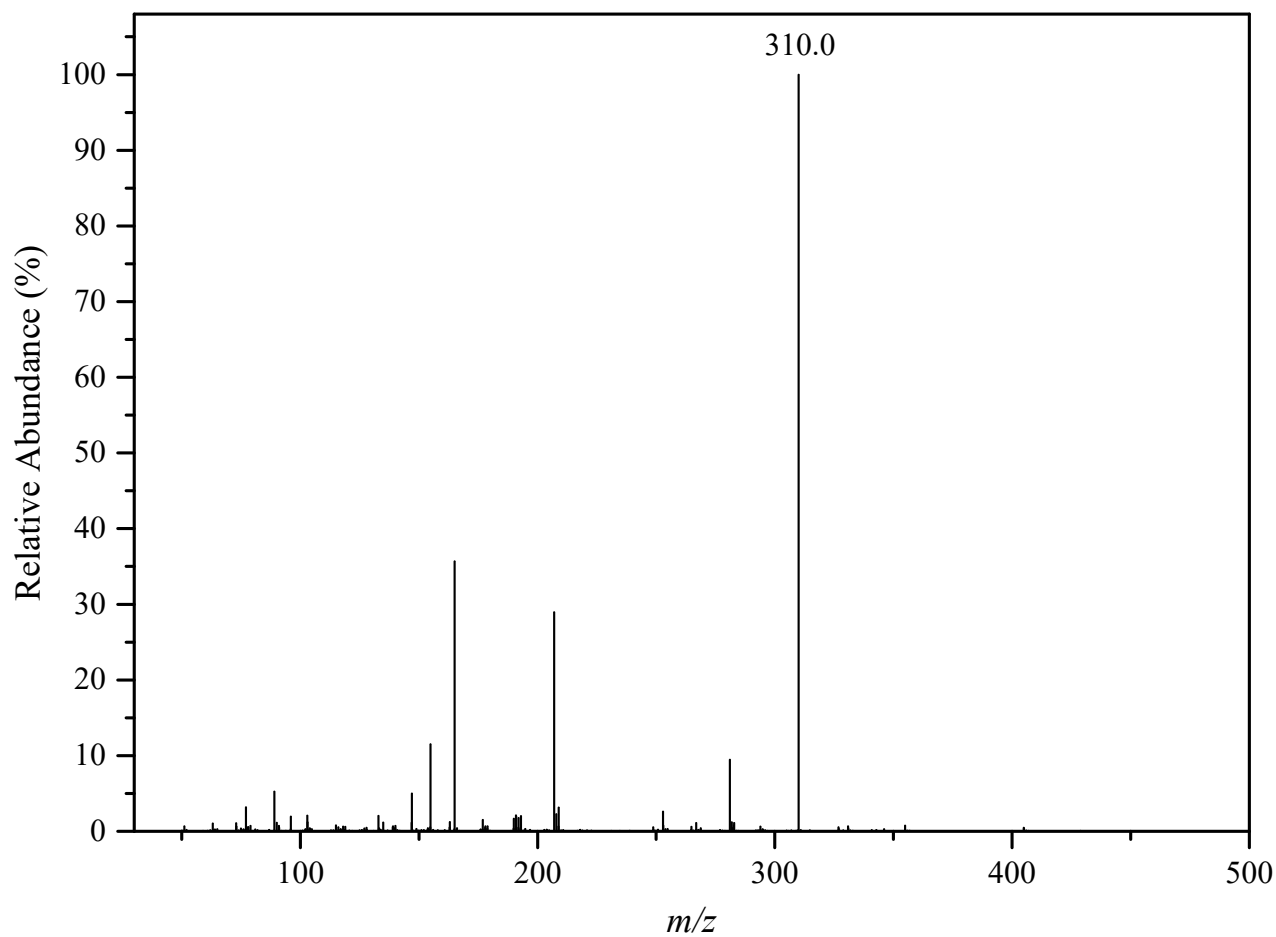

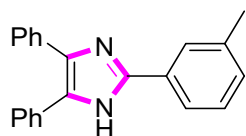

**4,5-diphenyl-2-(m-tolyl)-1*H*-imidazole (4c)**

**EI-MS:**  $C_{22}H_{18}N_2$ ,  $m/z$  (%) = 310.0 (52%)  $[M^+]$ .

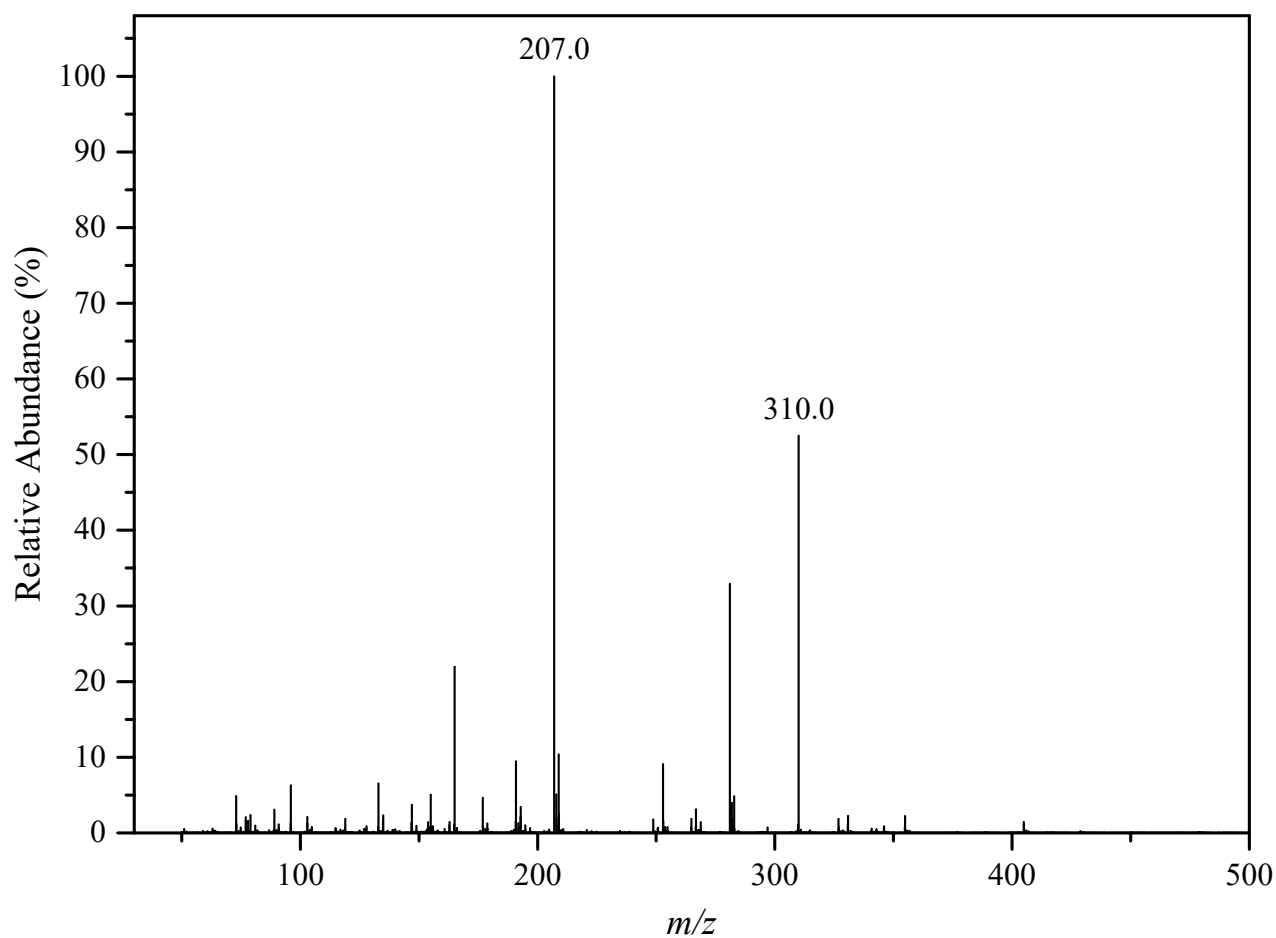

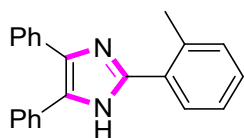

**4,5-diphenyl-2-(o-tolyl)-1*H*-imidazole (4d)**

**EI-MS:**  $C_{22}H_{18}N_2$ ,  $m/z$  (%) = 310.0 (100%) [ $M^+$ ].

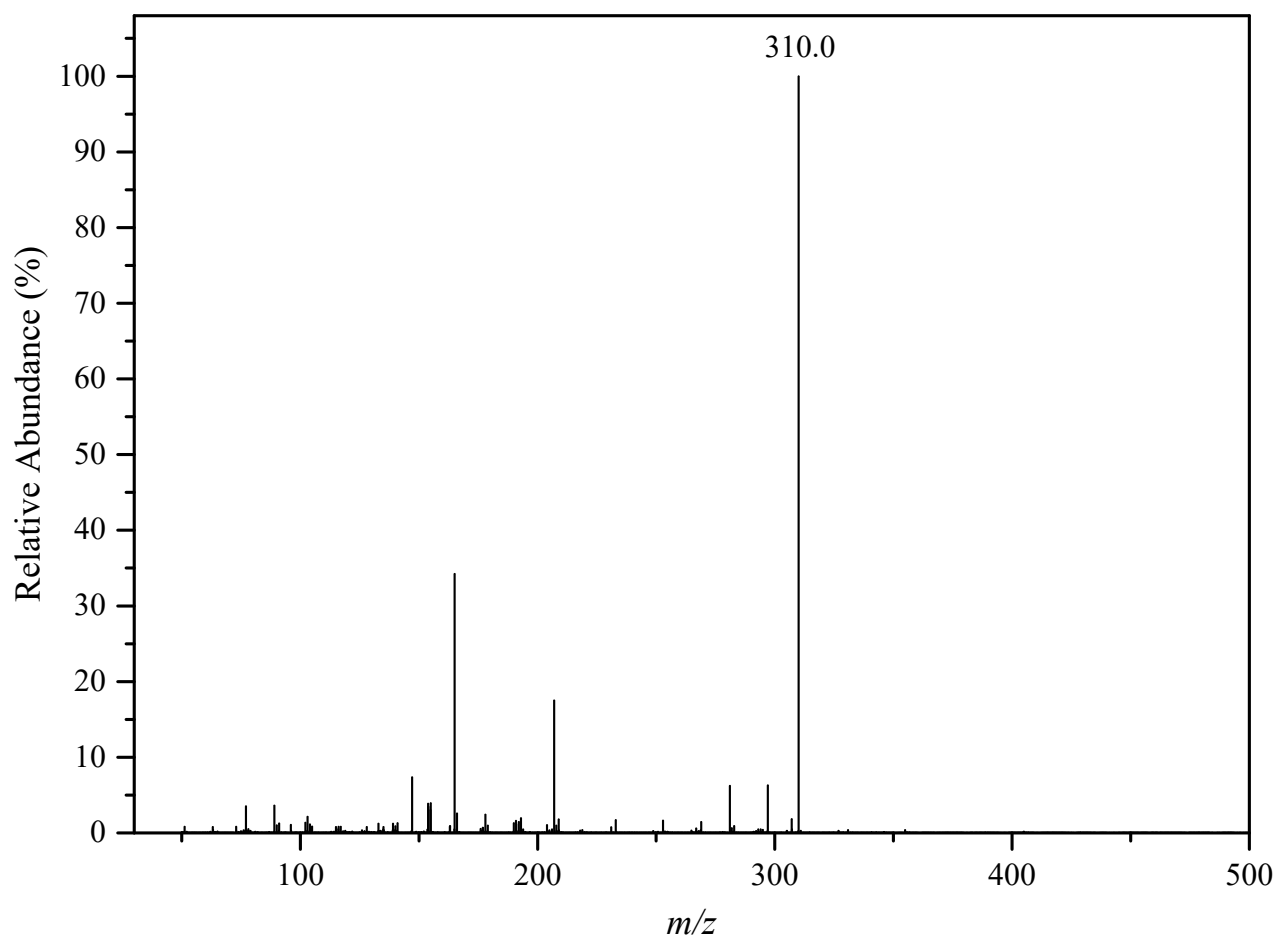

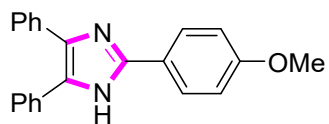

**2-(4-methoxyphenyl)-4,5-diphenyl-1*H*-imidazole (4e)**

**EI-MS:** C<sub>22</sub>H<sub>18</sub>N<sub>2</sub>O,  $m/z$  (%) = 326.0 (100%) [M<sup>+</sup>].

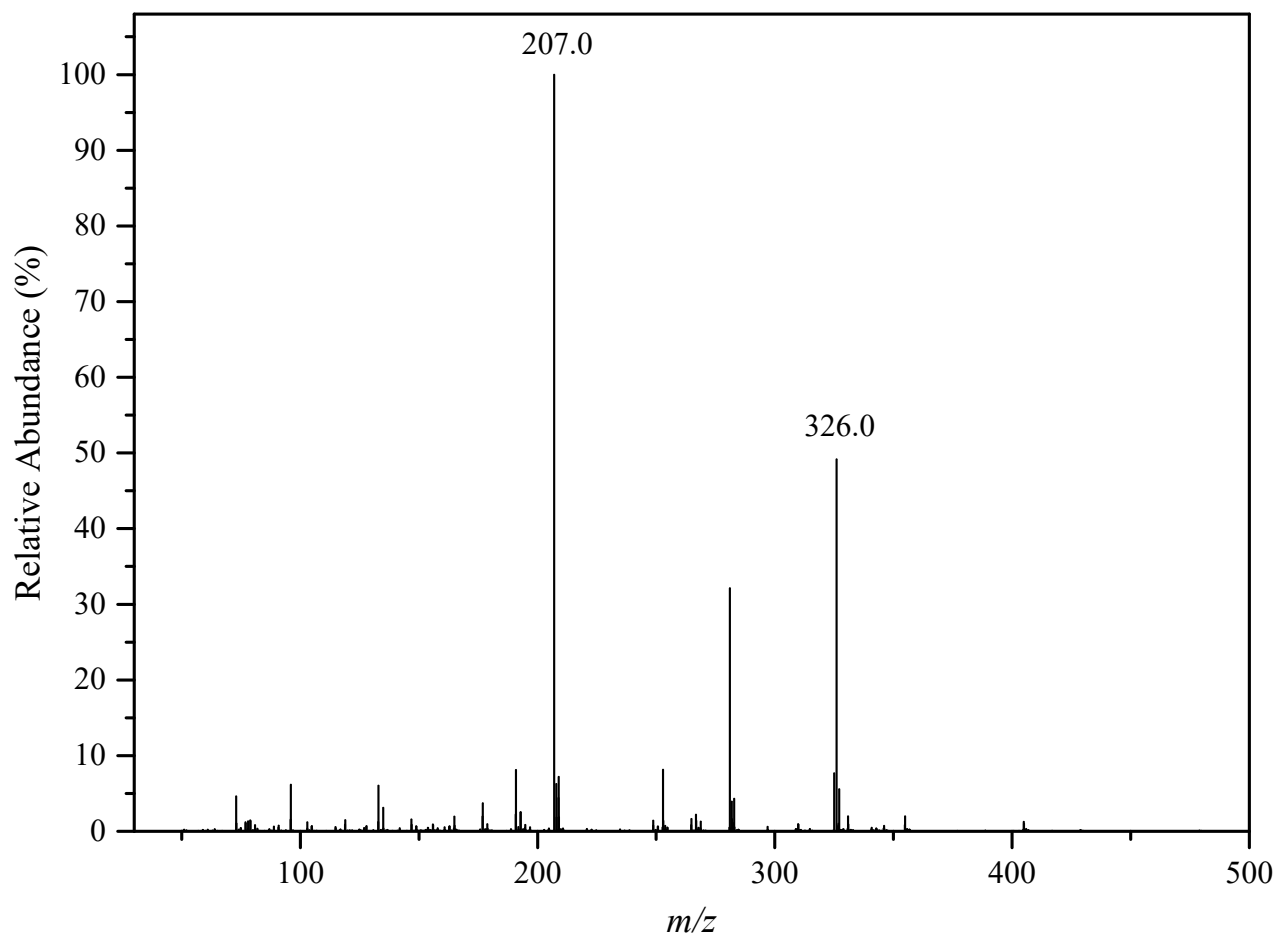

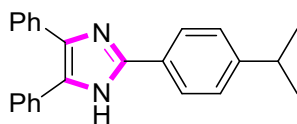

**2-(4-isopropylphenyl)-4,5-diphenyl-1*H*-imidazole (4f)**

**EI-MS:** C<sub>24</sub>H<sub>22</sub>N<sub>2</sub>, *m/z* (%) = 338.0 (62%) [M<sup>+</sup>].

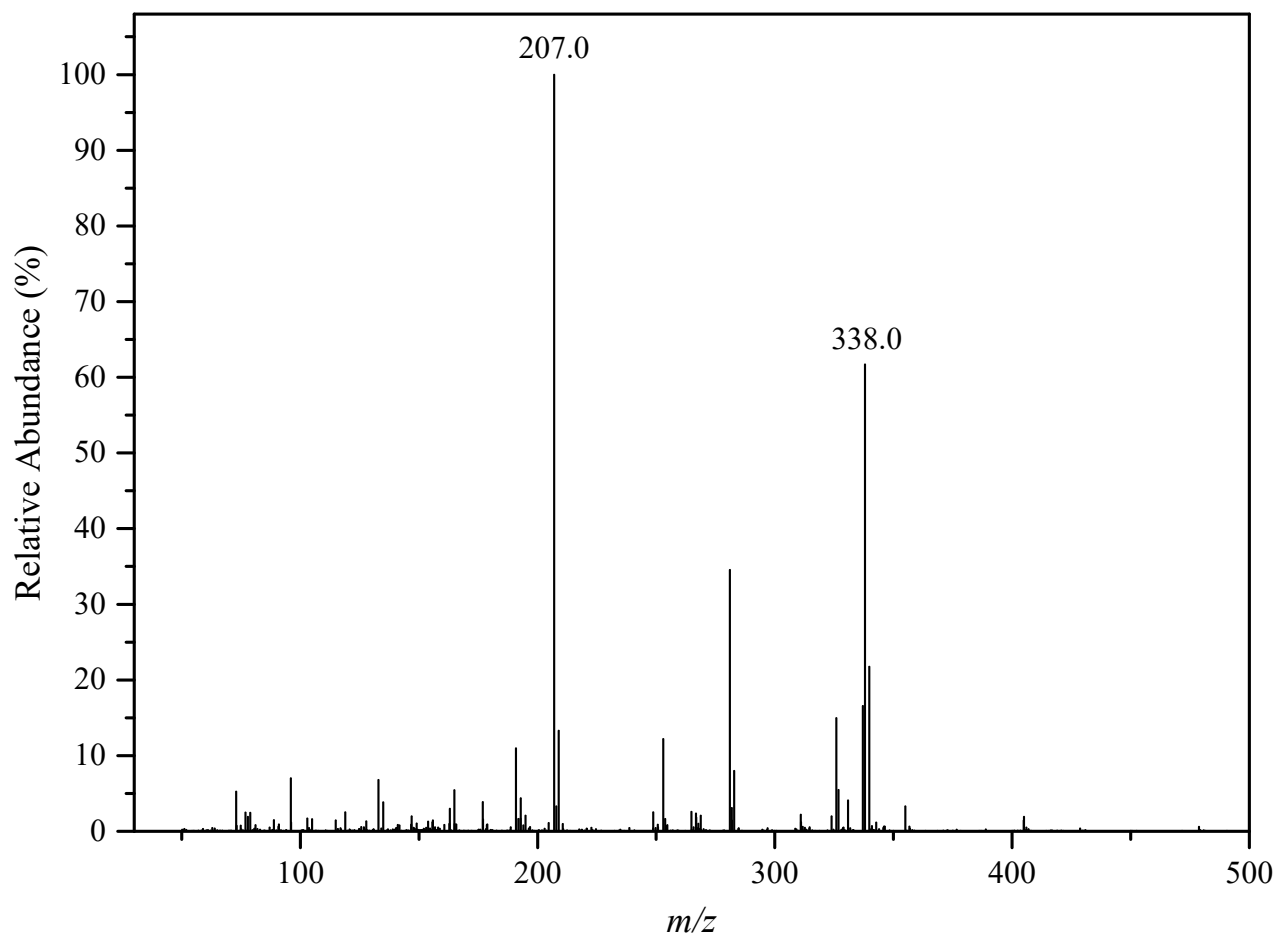

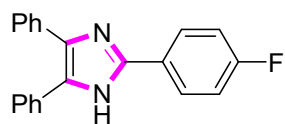

**2-(4-fluorophenyl)-4,5-diphenyl-1*H*-imidazole (4g)**

**EI-MS:**  $C_{21}H_{15}FN_2$ ,  $m/z$  (%) = 314.0 (59%)  $[M^+]$ .

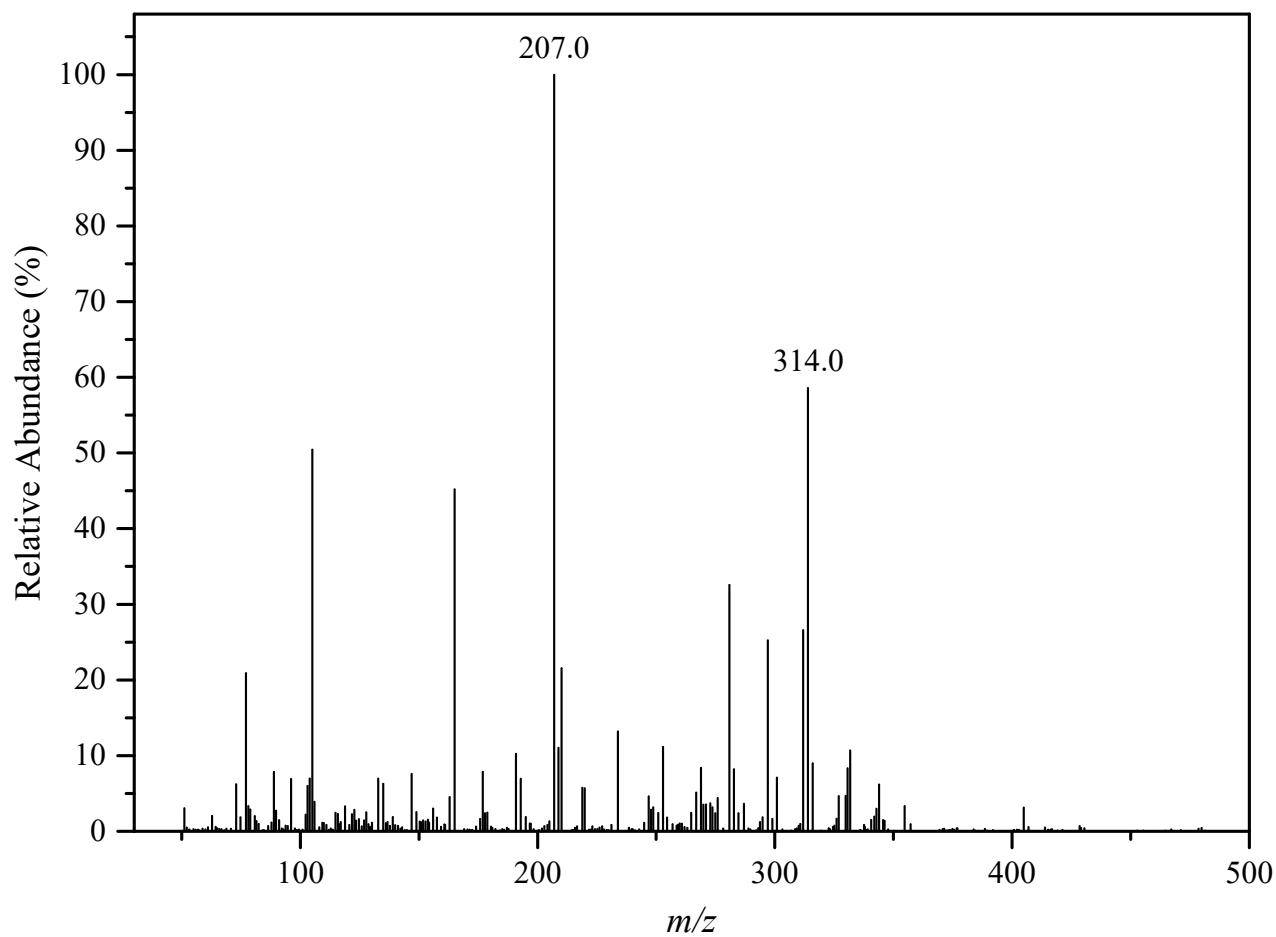



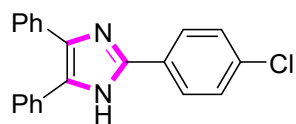

**2-(4-chlorophenyl)-4,5-diphenyl-1*H*-imidazole (4h)**

**EI-MS:**  $C_{21}H_{15}ClN_2$ ,  $m/z$  (%) = 330.0 (54%)  $[M^+]$ .

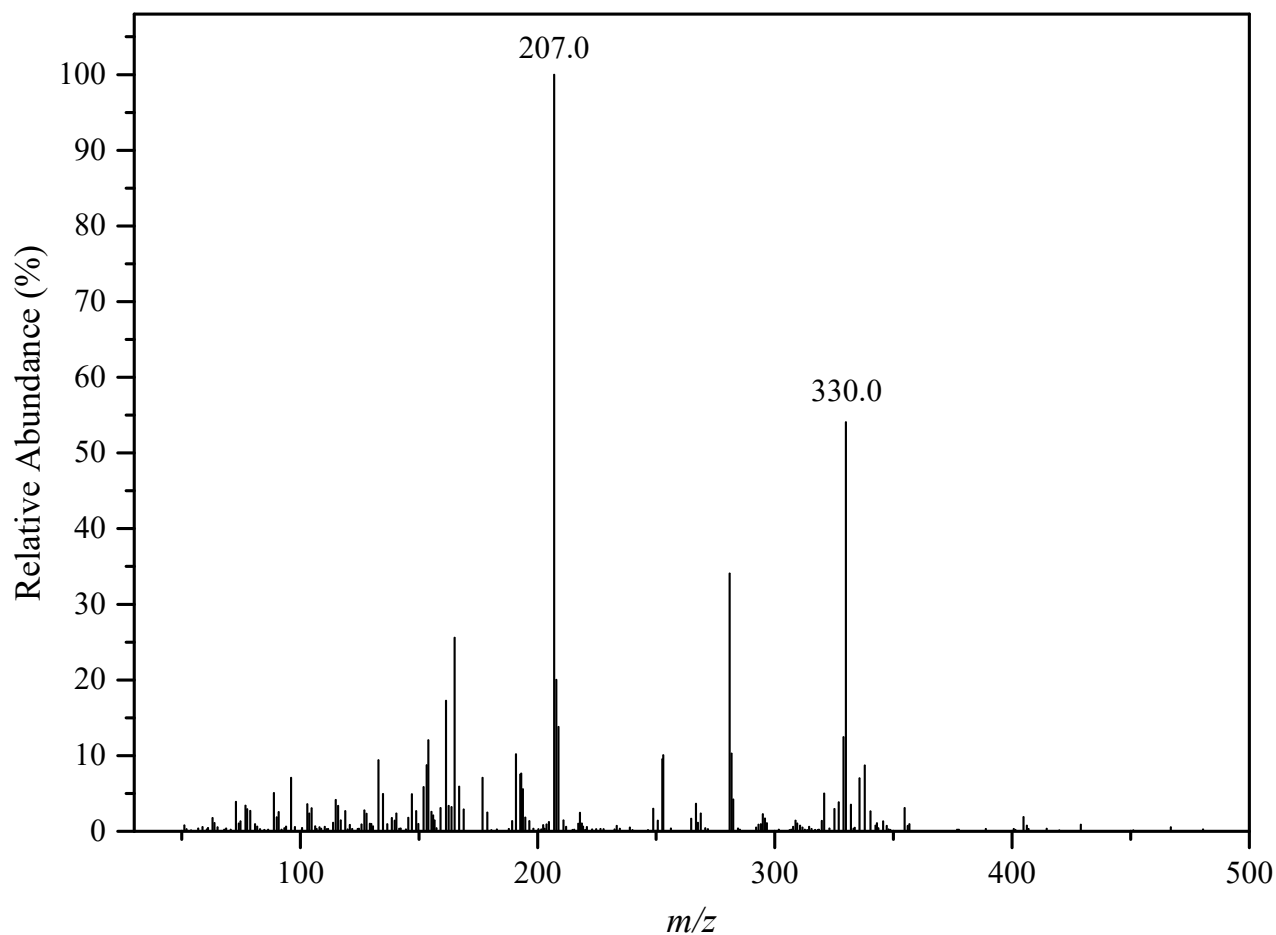

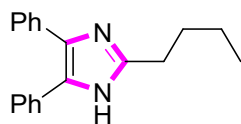

**2-butyl-4,5-diphenyl-1*H*-imidazole (4i)**

**EI-MS:** C<sub>19</sub>H<sub>20</sub>N<sub>2</sub>,  $m/z$  (%) = 276.0 (42%) [M<sup>+</sup>].

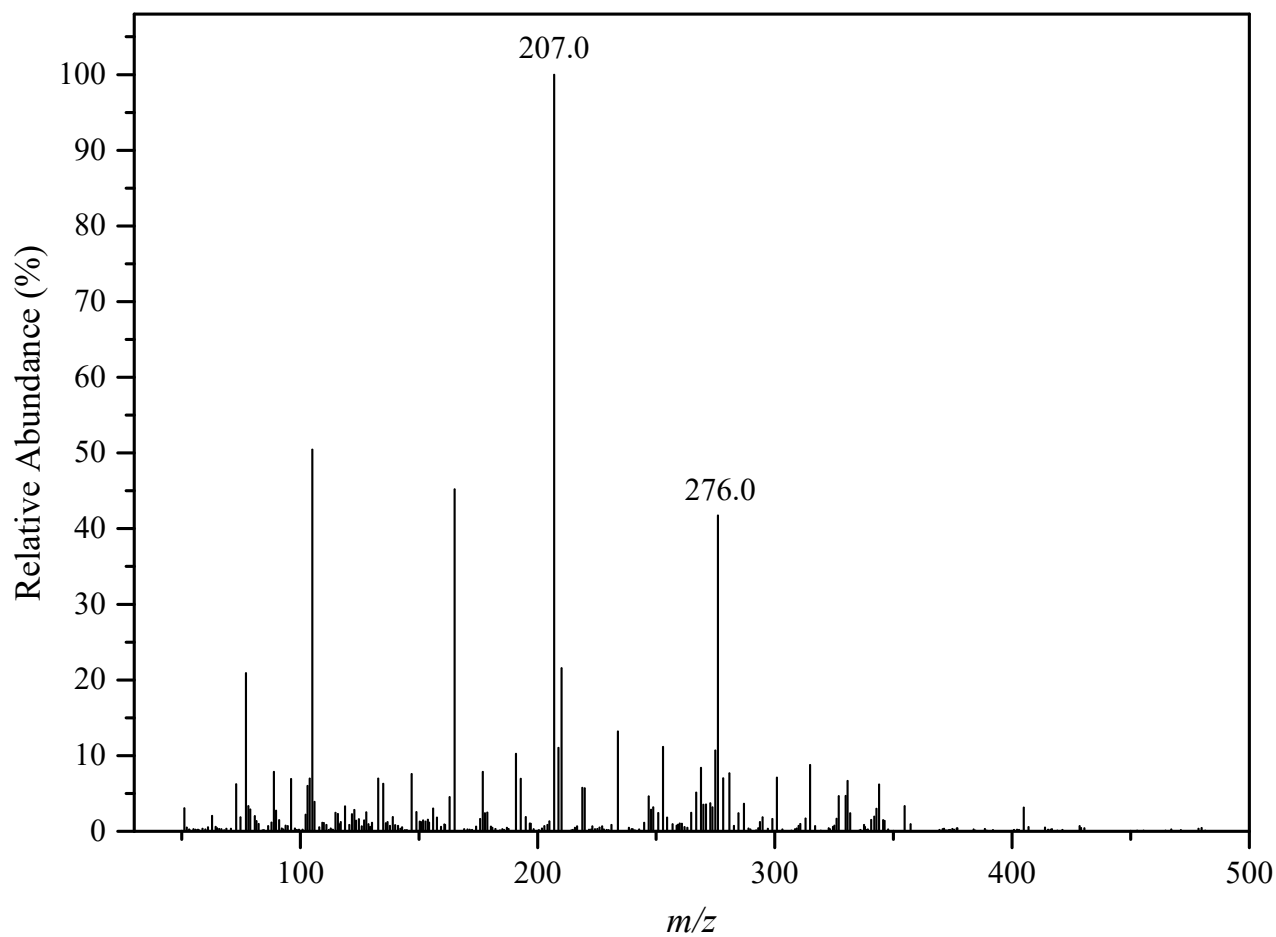

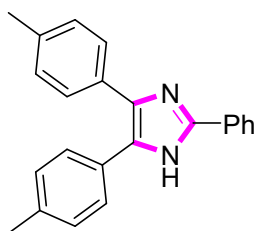

**2-phenyl-4,5-di-p-tolyl-1*H*-imidazole (4j)**

**EI-MS:**  $C_{23}H_{20}N_2$ ,  $m/z$  (%) = 324.0 (36%) [ $M^+$ ].

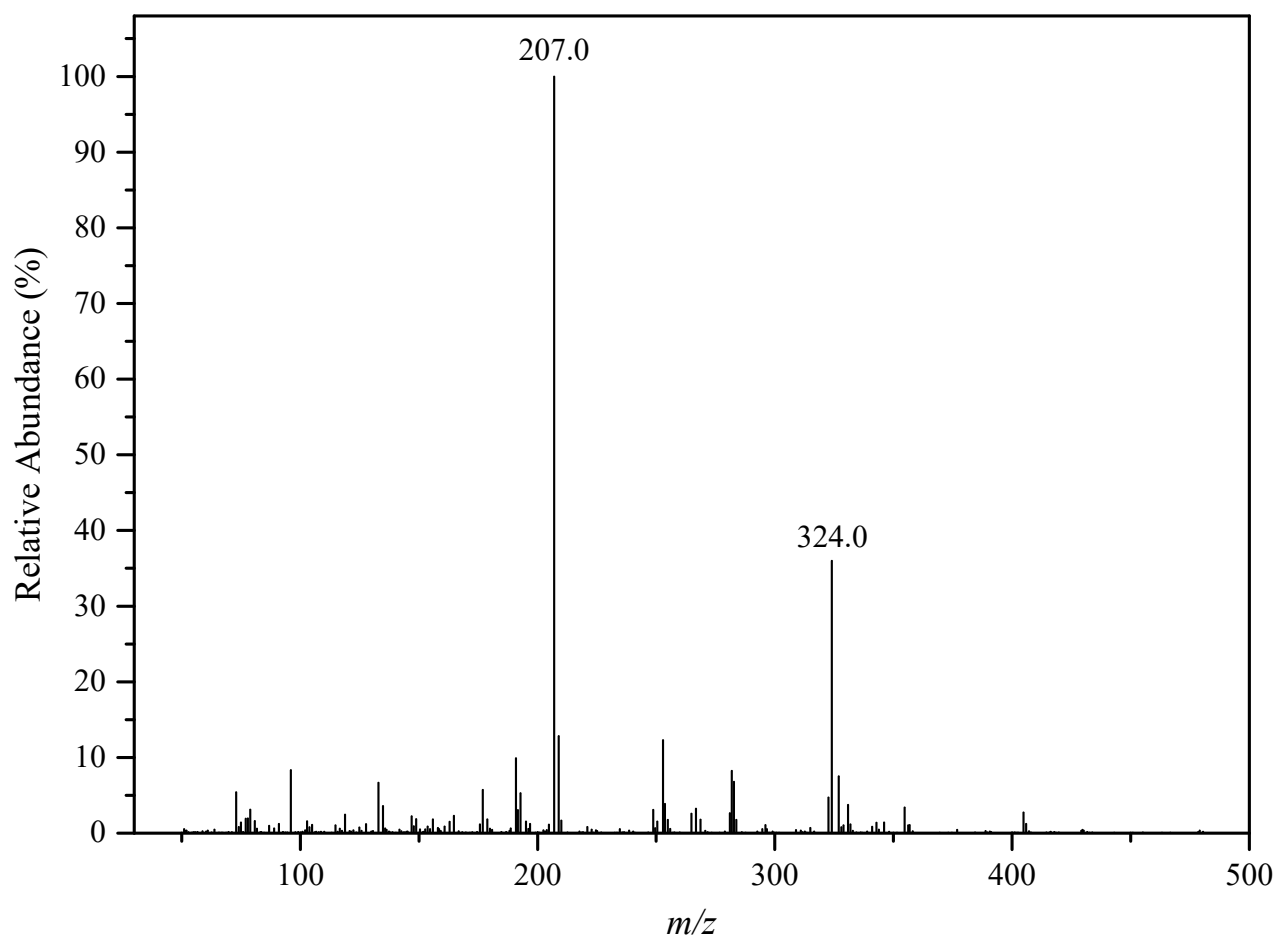

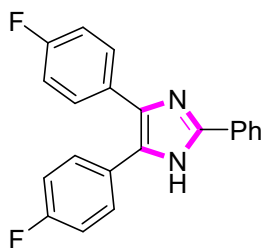

**4,5-bis(4-fluorophenyl)-2-phenyl-1*H*-imidazole (4k)**

**EI-MS:** C<sub>21</sub>H<sub>14</sub>F<sub>2</sub>N<sub>2</sub>,  $m/z$  (%) = 332.0 (46%) [M<sup>+</sup>].

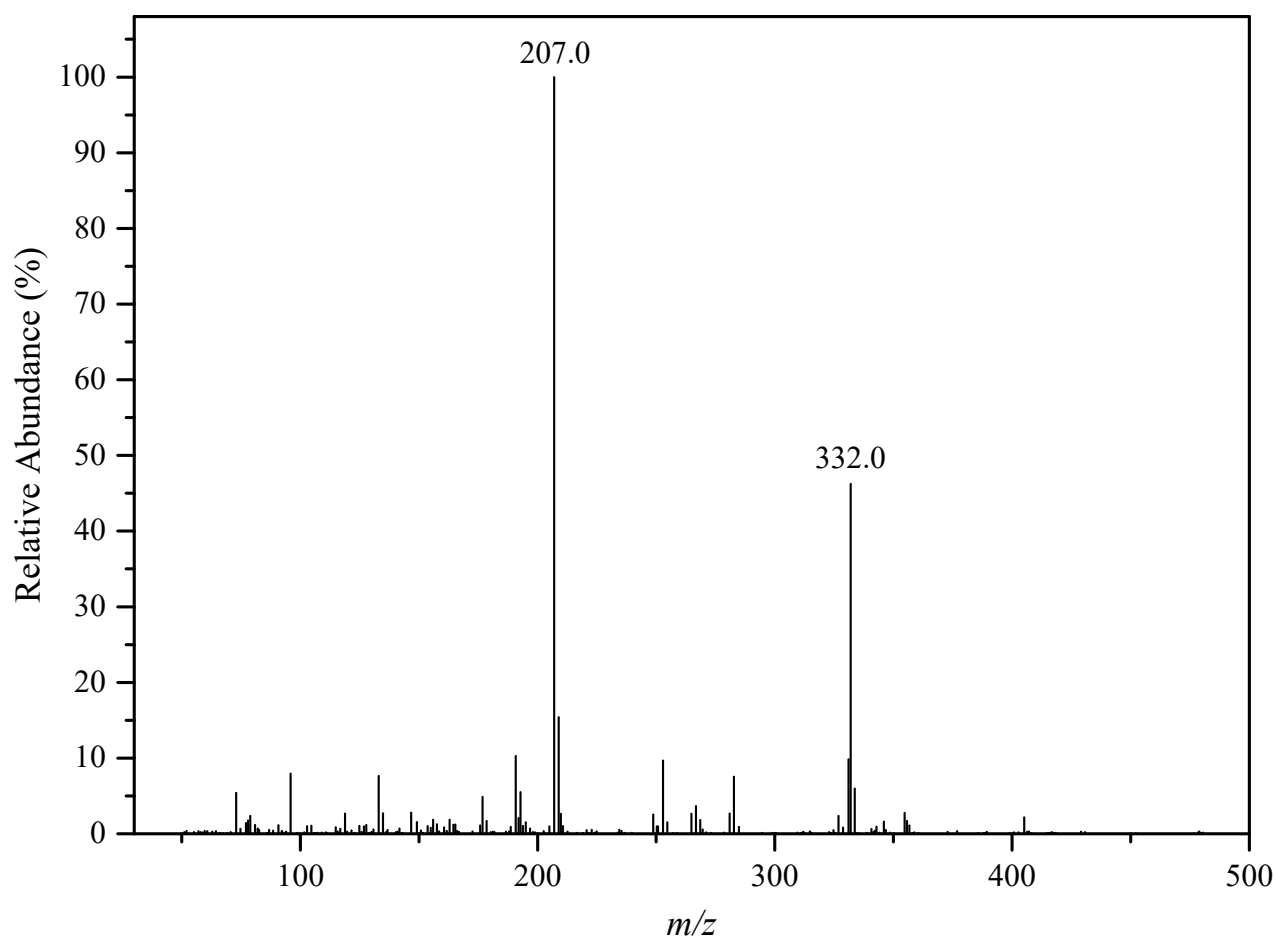

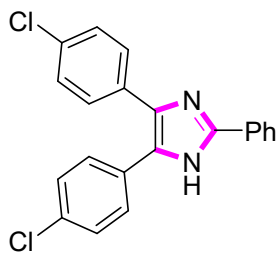

**4,5-bis(4-chlorophenyl)-2-phenyl-1*H*-imidazole (4l)**

**EI-MS:**  $C_{21}H_{14}Cl_2N_2$ ,  $m/z$  (%) = 364.0 (40%) [ $M^+$ ].

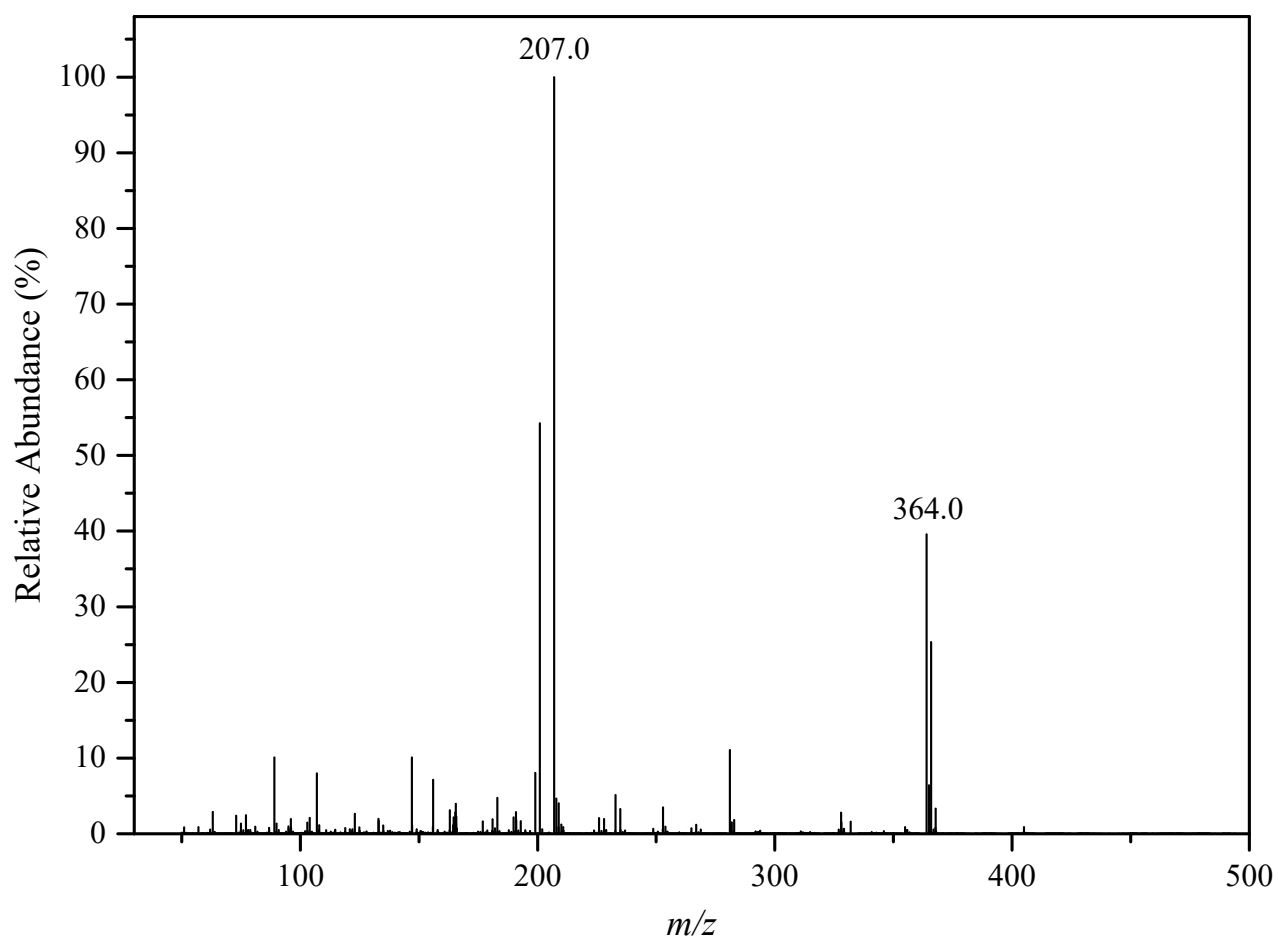

## 5. Notes and References

- (1) Bruker, A. *APEX3* Package, *APEX3*, *SAINT* and *SADABS*. **2016**.
- (2) (a) Spek, A. L. Single-Crystal Structure Validation with the Program *PLATON*. *J. Appl. Cryst.* **2003**, *36*, 7-13; (b) Spek, A. L. Structure Validation in Chemical Crystallography. *Acta Cryst.* **2009**, *D65*, 148-155; (c) Spek, A. L. What Makes a Crystal Structure Report Valid? *Inorg. Chim. Acta* **2018**, *470*, 232-237; (d) Dolomanov, O. V.; Bourhis, L. J.; Gildea, R. J.; Howard, J. A.; Puschmann, H. *OLEX2*: A Complete Structure Solution, Refinement and Analysis Program. *J. Appl. Cryst.* **2009**, *42*, 339-341; (e) Sheldrick, G. M. SHELXT–Integrated Space-Group and Crystal-Structure Determination. *Acta Cryst.* **2015**, *A71*, 3-8; (f) Sheldrick, G. M. Crystal Structure Refinement with *SHELXL*. *Acta Cryst.* **2015**, *C71*, 3-8.
- (3) (a) Brese, N.; O'keeffe, M. Bond-Valence Parameters for Solids. *Acta Cryst.* **1991**, *B47*, 192-197; (b) Brown, I.; Altermatt, D. Bond-Valence Parameters Obtained from a Systematic Analysis of the Inorganic Crystal Structure Database. *Acta Cryst.* **1985**, *B41*, 244-247.
- (4) Kohli, S.; Nisha; Rathee, G.; Hooda, S.; Chandra, R. *Nanoscale Adv.* **2023**, *5*, 2352.
- (5) Esmailpour, M.; Javidi, J.; Zandi, M. *New J. Chem.* **2015**, *39*, 3388-3398.
- (6) Masteri-Farahani, M.; Ezabadi, A.; Mazarei, R.; Ataenia, P.; Shahsavari, S.; Mousavi, F. *Appl. Organomet. Chem.* **2020**, *34*, e5727.
- (7) Sharma, S.D.; Hazarika, P.; Konwar, D. *Tetrahedron Lett.* **2008**, *49*, 2216-2220.
- (8) Tan, J.; Li, R. J.; Hu, Y. L. *J. Saudi Chem. Soc.* **2020**, *24*, 777-784.
- (9) Samai, S.; Nandi, G. C.; Singh, P.; Singh, M. S. *Tetrahedron.* **2009**, *65*, 10155-10161.
- (10) Sinha, D.; Biswas, S.; Das, M.; Ghatak, A. *J. Mol. Struct.* **2021**, 1242, 130823.
- (11) (a) Thimmaraju N.; Mohamed Shamsuddin S. Z. Synthesis of 2,4,5-trisubstituted imidazoles, quinoxalines and 1,5-benzodiazepines over an eco-friendly and highly efficient  $\text{ZrO}_2\text{--Al}_2\text{O}_3$  catalyst. *RSC Adv.* **2016**, *6*, 60231-60243; (b) Saranya S.; Ramesh R. Direct synthesis of 2,4,5-trisubstituted imidazoles from primary alcohols by diruthenium(II) catalysts under aerobic conditions. *Org. Biomol. Chem.* **2019**, *17*, 1402-1409.
